# Supplementary material for: Astaxanthin Attenuates Hypertensive Vascular Remodeling by Protecting Vascular Smooth Muscle Cells from Oxidative Stress-Induced Mitochondrial Dysfunction
Source: Hindawi journal article supplement (doi:10.1155/2020/4629189), 2020-04-14
Supplement: f1 [file 4629189.f1.pdf]

Table S1 EC50 analyses for phenylephrine and Ca<sup>2+</sup> induced vasocontractions.

|                            |           | WKY   | WKY+ATX | SHR    | SHR+ATX            |
|----------------------------|-----------|-------|---------|--------|--------------------|
|                            | n         | 8     | 8       | 8      | 8                  |
| Phe with E                 | Mean(log) | -6.14 | -6.11   | -6.76* | -6.42 <sup>#</sup> |
|                            | Sd        | 0.05  | 0.04    | 0.06   | 0.05               |
| Phe without E              | Mean(log) | -7.14 | -7.13   | -7.34* | -7.16 <sup>#</sup> |
|                            | Sd        | 0.05  | 0.06    | 0.07   | 0.05               |
| Ca <sup>2+</sup> with E    | Mean(log) | -3.82 | -3.73   | -3.89  | -4.02              |
|                            | Sd        | 0.95  | 0.27    | 0.10   | 0.81               |
| Ca <sup>2+</sup> without E | Mean(log) | -3.88 | -3.80   | -3.88  | -3.91              |
|                            | Sd        | 0.11  | 0.12    | 0.10   | 0.15               |

Phe, phenylephrine; E, endothelium. \* P<0.05 vs.corresponding WKYs; <sup>#</sup> P<0.05 vs. corresponding SHRs.

Table S2 Maximum response analyses for phenylephrine and Ca<sup>2+</sup> induced vasocontractions.

|                            |          | WKY    | WKY+ATX | SHR     | SHR+ATX             |
|----------------------------|----------|--------|---------|---------|---------------------|
|                            | n        | 8      | 8       | 8       | 8                   |
| Phe with E                 | Mean (%) | 97.19  | 96.79   | 139.00* | 104.37 <sup>#</sup> |
|                            | Sd       | 9.12   | 12.83   | 15.27   | 11.70               |
| Phe without E              | Mean (%) | 157.73 | 161.69  | 207.65* | 176.70 <sup>#</sup> |
|                            | Sd       | 15.96  | 16.81   | 18.30   | 13.26               |
| Ca <sup>2+</sup> with E    | Mean (%) | 99.83  | 93.83   | 147.40* | 117.85 <sup>#</sup> |
|                            | Sd       | 18.71  | 13.54   | 18.31   | 18.83               |
| Ca <sup>2+</sup> without E | Mean (%) | 135.46 | 129.46  | 182.22* | 154.44 <sup>#</sup> |
|                            | Sd       | 13.60  | 8.97    | 16.01   | 18.50               |

Phe, phenylephrine; E, endothelium. \* P<0.05 vs.corresponding WKYs; <sup>#</sup> P<0.05 vs. corresponding SHRs.
